# Supplementary material for: Non-canonical WNT5a regulates Epithelial-to-Mesenchymal Transition in the mouse ovarian surface epithelium
Source: PubMed Central journal article supplement (PMC7298016; doi:10.1038/s41598-020-66559-9), 2020-06-16
Supplement: 41598_2020_66559_MOESM1_ESM.pdf [file 41598_2020_66559_MOESM1_ESM.pdf]

**Table S1:** List of mouse probes and primers used for qPCR analysis

| <b>Gene</b>     | <b>Sequence</b>                                                                     |
|-----------------|-------------------------------------------------------------------------------------|
| <i>Cd44</i>     | (5'-/56-FAM/TCTTCTGCC/ZEN/<br>CACACCTTCTCCTACT/3IABkFQ/-3')                         |
| <i>Vimentin</i> | (5'-/56-FAM/AGCATCTCC/ZEN/<br>TCCTGCAATTTCTCTCG/3IABkFQ/-3')                        |
| <i>Krt19</i>    | (5'-/56-FAM/AATCTTGTC/ZEN/<br>GCGCAAGTCCTCGA/3IABkFQ/-3')                           |
| <i>Ptgs2</i>    | Forward - CAA AAG AAG TGC TGG AAA AGG T<br>Reverse - GGA TGA ACT CTC TCC GTA GAA GA |
| <i>a-Sma</i>    | Forward – GTACCACCATGTACCCAGGC<br>Reverse - GCTGGAAGGTAGACAGCGAA                    |
| <i>Coll1a1</i>  | Forward – CAGTCGCTTCACCTACAGCA<br>Reverse - CGGGAGGTCTTGGTGGTTTT                    |
| <i>Twist</i>    | Forward - AGC TAC GCC TTC TCC GTC T<br>Reverse - TCC TTC TCT GGA AAC AAT GAC A      |
| <i>Nanog</i>    | Forward - CAG AAG GGC TCA GCA CCA G<br>Reverse - AGG CTT CCA GAT GCG TTC A          |
| <i>Alcam</i>    | Forward - AAA CTC CCT GAA TGT CTC TGC<br>Reverse - AGA CCA ACG ACA ATT CCC AC       |
| <i>Snail</i>    | Forward - GTC TGC ACG ACC TGT GGA A<br>Reverse - CAG GAG AAT GGC TTC TCA CC         |
| <i>Zeb1</i>     | Forward - GCC AGC AGT CAT GAT GAA AA<br>Reverse – TAT CAC AAT ACG GGC AGG TG        |
| <i>Ppia</i>     | (5'-/56-FAM/TGCTTGCCA/ZEN/<br>TCCAGCCATTCAG/3IABkFQ/-3')                            |
